# Ancestral centriole and flagella proteins identified by analysis of *Naegleria* differentiation

Lillian K. Fritz-Laylin and W. Zacheus Cande\*

Department of Molecular and Cell Biology, University of California, Berkeley, CA 94720, USA

\*Author for correspondence ([zcande@berkeley.edu](mailto:zcande@berkeley.edu))

Accepted 25 August 2010

Journal of Cell Science 123, 4024–4031

© 2010. Published by The Company of Biologists Ltd

doi:10.1242/jcs.077453

## Summary

*Naegleria gruberi* is a single-celled eukaryote best known for its remarkable ability to form an entire microtubule cytoskeleton de novo during its metamorphosis from an amoeba into a flagellate, including basal bodies (equivalent to centrioles), flagella and a cytoplasmic microtubule array. Our publicly available full-genome transcriptional analysis, performed at 20-minute intervals throughout *Naegleria* differentiation, reveals vast transcriptional changes, including the differential expression of genes involved in metabolism, signaling and the stress response. Cluster analysis of the transcriptional profiles of predicted cytoskeletal genes reveals a set of 55 genes enriched in centriole components (induced early) and a set of 82 genes enriched in flagella proteins (induced late). The early set includes genes encoding nearly every known conserved centriole component, as well as eight previously uncharacterized, highly conserved genes. The human orthologs of at least five genes localize to the centrosomes of human cells, one of which (here named Friggin) localizes specifically to mother centrioles.

**Key words:** *Naegleria*, Assembly, Centriole, Evolution, Flagella

## Introduction

*Naegleria gruberi* grows as an amoeba without flagella, centrioles or even cytoplasmic microtubules; it relies on an actin-based cytoplasmic cytoskeleton for chemotaxis and motility, and its mitotic spindle is contained within an intact nuclear envelope (Fulton, 1970; Fulton, 1977; Fulton and Dingle, 1971). However, when exposed to stressors such as changes in temperature or nutrient availability, *Naegleria* rapidly differentiates into a flagellate, forming a complete cytoplasmic microtubule cytoskeleton from scratch (Fig. 1) (Fulton and Dingle, 1967). This differentiation occurs synchronously – approximately 90% of cells assemble basal bodies (structures equivalent to centrioles) within a 15-minute window, followed by flagella approximately 10 minutes later (Fig. 1) (Fulton and Dingle, 1971). Although *Naegleria* assembles basal bodies de novo, protein incorporation occurs in the same order as that occurring during assembly of human centrioles (Fritz-Laylin et al., 2010a). The evolutionary distance of *Naegleria* from animals means that genes shared between *Naegleria* and humans were probably present in the ancestor of all eukaryotes (Cavalier-Smith, 2002; Ciccarelli et al., 2006) (for a review, see Fritz-Laylin et al., 2010b). Thus, *Naegleria* differentiation affords a unique opportunity to study ancestral features of centriole and flagellum assembly.

Interphase animal cells contain numerous microtubules emanating from microtubule organizing centers (MTOCs) called centrosomes. Centrosomes contain centrioles that are primarily composed of nine microtubule triplets, and the surrounding amorphous pericentriolar material (PCM) that anchors cytoplasmic microtubules. Centrioles are called basal bodies when they are used to organize axonemes, the microtubule core of eukaryotic cilia and flagella. These whip-like structures propel single-celled organisms and move fluids within multicellular organisms. Metazoan cells also have nonmotile cilia that function as ‘cellular antennae’ by gathering information about the surrounding

environment using their varied signaling receptors (Marshall and Nonaka, 2006).

Proteomic analyses indicate that centrosomes and basal bodies contain many of the same proteins, a large number of which are thought to be functional components of centrioles (Andersen et al., 2003; Keller et al., 2005; Kilburn et al., 2007). However, only a handful of these proteins have been characterized functionally (Strnad and Gönczy, 2008). This is in part due to the technical difficulties associated with studying centriole assembly in most organisms. First, new centrioles usually assemble in association with a mature centriole, hindering proteomic characterization of assembly intermediates. Second, centriole assembly is usually tied to the cell cycle, rendering it difficult to distinguish centriole-specific genes from other induced cell cycle genes. And finally, de novo assembly (where centrioles are built in the absence of preexisting ones) usually occurs in a single cell or embryo, making proteomic or microarray-based approaches unfeasible. Here, we used the synchronous de novo basal body assembly pathway of *Naegleria* to overcome these technical roadblocks and identify genes used specifically for building basal bodies and flagella.

## Results and Discussion

### Flagella and basal body gene transcripts are induced with different kinetics

We isolated total RNA at 20-minute intervals during *Naegleria* differentiation (at 0, 20, 40, 60 and 80 minutes; Fig. 1) from three biological replicates (supplementary material Fig. S1A). The relative abundance of transcripts from each time-point was quantified using custom full-genome *Naegleria* DNA microarrays. Approximately 24% of *Naegleria* genes are induced at least twofold, and an additional 39% are reduced by at least 50% during the amoeba-to-flagellate transition (4065 and 6484 genes, respectively;  $P < 0.01$ , after correction for multiple testing). Differentially regulated genes include those involved in stress

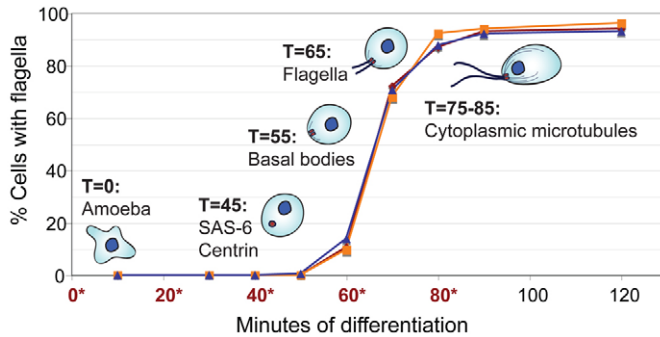

**Fig. 1. Selected events during differentiation of *Naegleria*.** Each of the three curves represents the percentage of cells with visible flagella during one differentiation replicate used for microarray analysis; the time-points collected are indicated with an asterisk (\*). Important events during assembly of the *Naegleria* basal body are indicated.

responses (including Hsp20 and Hsp 90; data not shown) and core metabolism (including glycolysis, Krebs cycle and pyruvate–acetate metabolism; data not shown), as well as cytoskeletal components.

Only a fraction of the thousands of induced genes are likely to be microtubule related. To aid in our search for uncharacterized and evolutionarily conserved centriole proteins, we focused on genes found in *Naegleria* and other flagellates but missing in non-flagellated organisms [the flagellar motility (FM) gene set (Fritz-Laylin et al., 2010b)]. FM members include genes specific to basal bodies and flagella but exclude genes such as that encoding  $\alpha$ -tubulin that are also used by organisms without flagella. To permit analysis of general microtubule proteins involved in basal body and flagella formation, we added *Naegleria* homologs of known microtubule cytoskeleton proteins (Fritz-Laylin et al., 2010b). Finally, we also added 63 genes conserved in organisms that undergo amoeboid movement and missing in organisms that do not undergo amoeboid locomotion [the amoeboid motility (AM) gene set] (Fritz-Laylin et al., 2010b), to serve as a specificity control.

Overall, 78% of the FMs and 60% of the AMs have at least twofold induction or repression, respectively ( $P < 0.01$ , after correction for multiple testing), providing large-scale confirmation of previous evidence that *Naegleria* differentiation is controlled at the transcriptional level (Lai et al., 1988; Levy et al., 1998). We next investigated whether the timing of gene expression was linked to function.

Cluster analysis of the expression data for these 310 genes (the AM and FM gene sets, and *Naegleria* homologs of known microtubule genes) resulted in five major gene clusters (A–E; Fig. 2). Clusters A and C consist primarily of genes found in the FM gene set and have increased expression during differentiation. However, the genes in cluster A reach peak expression levels by 20 minutes and begin decreasing in expression by 40 minutes, whereas the expression of genes in cluster C peaks by 40 minutes and remains high through to 80 minutes. Manual inspection revealed that the cluster with earlier expression contains many known centriole genes (Table 1), whereas the later expression cluster contains flagella genes (supplementary material Table S1). The general induction of basal body genes before flagella genes agrees with the fact that *Naegleria* assembles its basal bodies before it assembles its flagella ( $t = 55$  and  $t = 65$  minutes, respectively) (Fig. 1) (Fritz-Laylin et al., 2010a; Fulton and Dingle, 1971).

### Centriole-enriched gene cluster

The 55 genes found in the centriole gene cluster include *Naegleria* homologs of seven genes whose products are thought to be required for assembly of the centriole or basal body:  $\epsilon$ -,  $\delta$ - and  $\eta$ -tubulin, SAS-4 (CPAP), SAS-6, centrin (Cen2) and POC1 (for references, see Table 1). This set represents the majority of components shown to be required specifically for centriole assembly that are conserved outside animals (Carvalho-Santos et al., 2010; Hodges et al., 2010; Strnad and Gönczy, 2008). Other core centriole genes not found in the cluster either have not been identified in the *Naegleria* genome (*PLK4*) or were not included in the microarray (*BLD10*).

The centriole-enriched gene cluster also encodes homologs of microtubule nucleation factors [ $\gamma$ -tubulin, GCP3 and GCP6 (Raynaud-Messina and Merdes, 2007)], as well as proteins required for general microtubule functions, such as the microtubule-severing protein katanin p60, which is known to localize to centrosomes (Hartman et al., 1998). This gene set also includes several genes encoding centrosome-localized proteins of unknown function, and eight completely uncharacterized genes (Table 1).

Axonemal dyneins are large protein complexes containing light, intermediate and heavy chains that slide microtubules past each other to produce flagellar movement. Surprisingly, the centriole-enriched cluster includes nine axonemal dynein light and intermediate chain homologs, as well as a homolog of kintoun (PF13) that is required for assembly of dynein arm complexes (Omran et al., 2008). By contrast, *Naegleria* dynein heavy chain genes are expressed later along with other flagella-specific genes. Assembly of dynein light and intermediate chain complexes can be genetically uncoupled from assembly of the dynein heavy chain in *Chlamydomonas* (Omran et al., 2008). Although there are many possible reasons for the early expression of dynein light and intermediate chains, but not heavy chains, it is possible that *Naegleria* pre-assembles flagellar intermediate and light chain dyneins before incorporating heavy chains, before flagellar outgrowth.

### Flagella-enriched gene cluster

The flagella-enriched gene cluster contains 82 genes (supplementary material Table S1), including genes encoding proteins used for transporting proteins to the base of the growing flagellum (BBS components BBS1–BBS5 and BBS7–BBS9) and within the flagellum to its growing tip (FLA3, kinesin 2, IFT20, IFT52, IFT57, IFT80, IFT88, IFT122 and IFT140), as well as structural components of the flagellum itself [including PF20 and PF16, RSP4 and Rib72 (Pazour et al., 2005)]. This gene set also includes 23 FM genes with homologs found in the *Chlamydomonas* flagella proteome (Pazour et al., 2005) but which are otherwise uncharacterized. Together, these data suggest that these proteins are probably core components of eukaryotic flagella and therefore prime candidates for future functional analyses.

To validate the putative flagellar components, we conducted a proteomic analysis of *Naegleria* flagella. We purified the flagella of  $\sim 4 \times 10^8$  flagellate cells using low-speed centrifugation followed by a sucrose step-gradient. The resulting sample contained flagella and no visible cell bodies and comprised largely two proteins of a size similar to that of  $\alpha$ - and  $\beta$ -tubulin (supplementary material Fig. S1, panel B), as is typical for clean flagellar preparations (e.g. Kowit and Fulton, 1974). MUDPIT mass spectrometry analysis of the sample identified 415 proteins (supplementary material Table S2).

Of the 82 genes in the flagellar-enriched gene cluster, 23 were also identified in our proteomics analysis (supplementary material

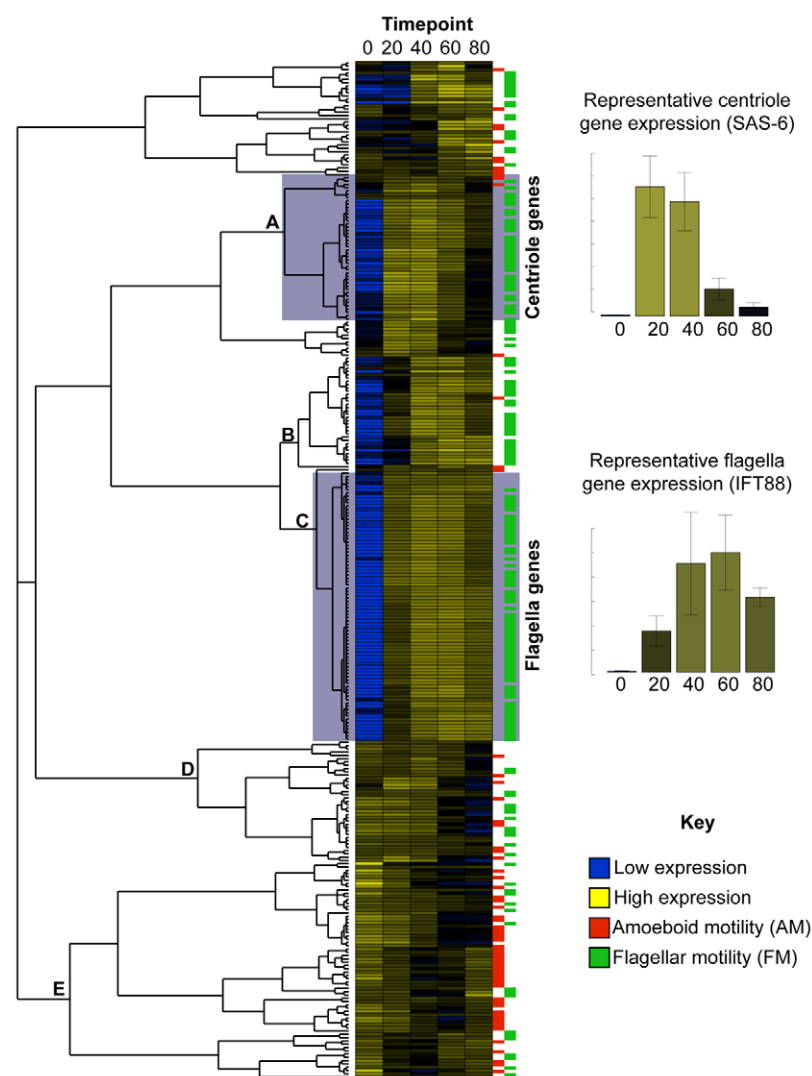

**Fig. 2. Centriole- and flagella-enriched gene clusters.** Each row represents one gene, with columns representing expression at the indicated time-point. Blue represents low expression, and yellow represents high expression. The cladogram groups genes based on similarity in expression across the five time-points; five major clusters are indicated (A–E). Red and green boxes on the right-hand side indicate membership of the AM (amoeboid motility) and FM (flagellar motility) gene sets, respectively. The graphs indicate relative gene expression – using as examples centriole-enriched cluster gene (*SAS-6*) and flagella-enriched cluster gene (*IFT88*). The data are plotted as the means  $\pm$  s.d. ( $n=3$ ).

Table S1), indicating that they are likely to be structural components of the flagellum itself (in contrast to proteins that might be required for flagellar function but are located within the cell body). Included in this overlap are seven flagellar-associated proteins (FAPs), which were identified in the proteomic analysis of *Chlamydomonas* flagella (Pazour et al., 2005) but remain otherwise uncharacterized. These proteins are therefore likely to be ancestral structural flagella components. The *Naegleria* flagellar proteome also includes a number of previously undescribed proteins (supplementary material Table S2), some of which might represent uncharacterized flagellar proteins.

#### Verification of putative centriole genes

The centriole-enriched gene cluster includes eight genes that have not previously been localized or otherwise characterized, which we refer to as ‘putative conserved centriole components’ (pCCCs; Table 1). Because orthologs of all centrosome-localized pCCCs can be found in a wide diversity of eukaryotes (supplementary material Table S3), they were probably present in the eukaryotic ancestor. To determine whether the pCCCs are likely to be centriole components, we transiently expressed N- and C-terminally GFP-tagged human orthologs of each pCCC in U2OS and HeLa human

cell lines and used antibodies recognizing  $\gamma$ -tubulin to highlight centrosomes. To the eight unknown gene products, we added one whose homolog localizes to the base of the cilia of *Caenorhabditis elegans* (B9D2) and one that has only very recently been characterized in human cells (MOT52, also known as FOR20 or BBC20) (Sedjai et al., 2010). Five of the ten tagged proteins showed either diffuse cytoplasmic GFP or bright foci likely to be inclusion bodies (data not shown). This nonspecific localization neither confirms nor denies a possible centriole function. However, the remaining five localized within or near centrosomes using both N- and C-terminal GFP tags (Fig. 3A) and are described below.

First, MOT52 is found only in organisms with motile flagella (Merchant et al., 2007), and its homolog (BBC20) was found in the *Tetrahymena* basal body proteome (Kilburn et al., 2007). Recently, the human ortholog (FOR20) was reported to localize to pericentriolar satellites and to be involved in ciliary assembly (Sedjai et al., 2010). FOR20 is predicted to have a FOP dimerization domain (Pfam domain PF09398), required for the centrosomal localization of the FOP protein (Mikolajka et al., 2006). In transient transfections of both U2OS (Fig. 3A) and HeLa cells (data not shown), GFP-tagged FOR20 localized to multiple foci near centrosomes. A similar localization was reported using an antibody

Table 1. Centriole-enriched gene cluster

| Class                                  | Ortholog              | Protein ID     | Function                                  | References                                                                                                                                                                                 |
|----------------------------------------|-----------------------|----------------|-------------------------------------------|--------------------------------------------------------------------------------------------------------------------------------------------------------------------------------------------|
| BB, centriole assembly                 | $\epsilon$ -Tubulin   | 44774          | BB, centriole assembly                    | (Dutcher et al., 2002)                                                                                                                                                                     |
|                                        | $\delta$ -Tubulin     | 69007          | BB, centriole assembly                    | (Dutcher and Trabuco, 1998; Garreau de Loubresse et al., 2001; O'Toole et al., 2003)                                                                                                       |
|                                        | $\eta$ -Tubulin       | 65724          | BB, centriole assembly                    | (Basto et al., 2006; Kirkham et al., 2003; Kleylein-Sohn et al., 2007; Leidel and Gonczy, 2003; Pelletier et al., 2006)                                                                    |
|                                        | SAS-6                 | 68996          | BB, centriole assembly                    | (Culver et al., 2009; Dammermann et al., 2004; Leidel et al., 2005; Nakazawa et al., 2007; Peel et al., 2007; Pelletier et al., 2006; Rodrigues-Martins et al., 2007; Strnad et al., 2007) |
|                                        | SAS-4 (CPAP)          | 61107          | BB, centriole assembly                    | (Basto et al., 2006; Kirkham et al., 2003; Kleylein-Sohn et al., 2007; Leidel and Gonczy, 2003; Pelletier et al., 2006)                                                                    |
|                                        | Centrin               | 44488<br>56351 | BB, centriole assembly                    | (Baum et al., 1986; Koblenz et al., 2003; Kuchka and Jarvik, 1982; Salisbury et al., 2002; Taillon et al., 1992; Winey et al., 1991)                                                       |
| MT-specific centrosome function        | POC1                  | 33676          | BB, centriole assembly                    | (Keller et al., 2009; Pearson et al., 2009)                                                                                                                                                |
|                                        | $\gamma$ -Tubulin     | 56069          | MT nucleation                             | (Raynaud-Messina and Merdes, 2007)                                                                                                                                                         |
|                                        | GCP6                  | 61337          | MT nucleation                             | (Raynaud-Messina and Merdes, 2007)                                                                                                                                                         |
|                                        | GCP3                  | 434            | MT nucleation                             | (Raynaud-Messina and Merdes, 2007)                                                                                                                                                         |
|                                        | SSA11 (TTL13)         | 80835          | Tubulin tyrosine ligase                   | (Hammond et al., 2008)                                                                                                                                                                     |
|                                        | Katanin P60           | 63871          | MT severing                               | (Hartman et al., 1998)                                                                                                                                                                     |
| BB, centriole, centrosome localization | $\alpha$ -Tubulin     | 71268<br>51830 | MTs                                       | (Dutcher, 2001)                                                                                                                                                                            |
|                                        | TBCE                  | 81169          | Putative tubulin chaperone                | (Dutcher, 2001)                                                                                                                                                                            |
|                                        | FOR20 (MOT52)         | 52938          | Pericentriolar satellites, centrosome     | (Sedjai et al., 2010)                                                                                                                                                                      |
|                                        | POC12                 | 29577          | Unknown                                   | (Keller et al., 2005)                                                                                                                                                                      |
|                                        | PIBF                  | 73664          | Unknown                                   | (Lachmann et al., 2004)                                                                                                                                                                    |
|                                        | TTL1                  | 33283          | Tubulin tyrosine ligase                   | (Wloga et al., 2008)                                                                                                                                                                       |
| BB-specific function                   | MKS6 (CC2D2A)         | 77673          | Cilium, BB function                       | (Gorden et al., 2008)                                                                                                                                                                      |
|                                        | MKS3 (meckelin)       | 62841          | BB migration, membrane docking            | (Dawe et al., 2007)                                                                                                                                                                        |
|                                        | B9D1                  | 52666          | Transition zone                           | (Williams et al., 2008)                                                                                                                                                                    |
|                                        | B9D2                  | 30379          | Transition zone                           | (Williams et al., 2008)                                                                                                                                                                    |
|                                        | MBO2                  | 62959          | Maintain direction of motility            | (Tam and Lefebvre, 2002)                                                                                                                                                                   |
|                                        | ODA6                  | 60431          | Dynein intermediate chain 2, axonemal     | (Pazour et al., 2005)                                                                                                                                                                      |
| Flagellar dynein complex               | IDA7                  | 57343          | Dynein intermediate chain, axonemal       | (Pazour et al., 2005)                                                                                                                                                                      |
|                                        | ODA6                  | 79232          | Dynein intermediate chain, axonemal       | (Pazour et al., 2005)                                                                                                                                                                      |
|                                        | DLC1                  | 74922          | Dynein light chain, axonemal              | (Pazour et al., 2005)                                                                                                                                                                      |
|                                        | IDA4 (P28)            | 82719          | Dynein light intermediate chain, axonemal | (Pazour et al., 2005)                                                                                                                                                                      |
|                                        | BOP5                  | 63304          | Dynein light intermediate chain, axonemal | (Pazour et al., 2005)                                                                                                                                                                      |
|                                        | TCTEXT1               | 29177          | Dynein light chain, axonemal              | (Harrison et al., 1998; Kagami et al., 1998)                                                                                                                                               |
| Putative flagellar function            | DLC1                  | 54720          | Dynein light chain, axonemal              | (Pazour et al., 2005)                                                                                                                                                                      |
|                                        | MOT24                 | 32555          | Dynein light chain, axonemal              | (Merchant et al., 2007)                                                                                                                                                                    |
|                                        | MOT45 (kintoun, PF13) | 80717          | Axonemal dynein complex assembly          | (Omran et al., 2008)                                                                                                                                                                       |
|                                        | FAP184                | 2066           | Unknown                                   | (Pazour et al., 2005)                                                                                                                                                                      |
|                                        | FAP215                | 66643          | Nucleotidase                              | (Pazour et al., 2005)                                                                                                                                                                      |
|                                        | FAP127                | 44967          | Unknown                                   | (Pazour et al., 2005)                                                                                                                                                                      |
| Previously uncharacterized (pCCCs)     | FAP57                 | 61313          | Unknown                                   | (Pazour et al., 2005)                                                                                                                                                                      |
|                                        | Friggin (MOT37)       | 61232          | Mother centriole localization             | This study                                                                                                                                                                                 |
|                                        | POC11                 | 70454          | Centrosome localization                   | This study                                                                                                                                                                                 |
|                                        | SSA3                  | 68814          | Centrosome localization                   | This study                                                                                                                                                                                 |
|                                        | Q6PH85                | 49668          | Unknown                                   |                                                                                                                                                                                            |
|                                        | POC16                 | 62107          | Unknown                                   |                                                                                                                                                                                            |
| Other                                  | LRR6                  | 31069          | Unknown                                   |                                                                                                                                                                                            |
|                                        | TECT3                 | 65759          | Unknown                                   |                                                                                                                                                                                            |
|                                        | MOT39                 | 72718          | Unknown                                   |                                                                                                                                                                                            |
|                                        | ?                     | 73058          | Dual-specificity phosphatase              |                                                                                                                                                                                            |
|                                        | PSK1                  | 78247          | Nucleotide kinase                         |                                                                                                                                                                                            |
|                                        | ?                     | 82958          | High-mobility-group protein               |                                                                                                                                                                                            |
|                                        | ?                     | 48624          | Lipid synthesis                           |                                                                                                                                                                                            |
|                                        | ?                     | 29264          | HUS-1-like protein                        |                                                                                                                                                                                            |
|                                        | ?                     | 81040          | BTG-domain protein                        |                                                                                                                                                                                            |
|                                        | MOT50                 | 54684          | Chymotrypsin-like protein                 |                                                                                                                                                                                            |
|                                        |                       | 71996          | Chymotrypsin-like protein                 |                                                                                                                                                                                            |

The 55 genes in the centrosome-enriched cluster are organized by function (or predicted function), followed by ortholog gene and/or protein names, with appropriate references in the last column. ?, no identifiable ortholog; BB, basal body; MT, microtubule. Sequence information for *Naegleria* protein IDs is available at [www.jgi.doe.gov/naegleria](http://www.jgi.doe.gov/naegleria).



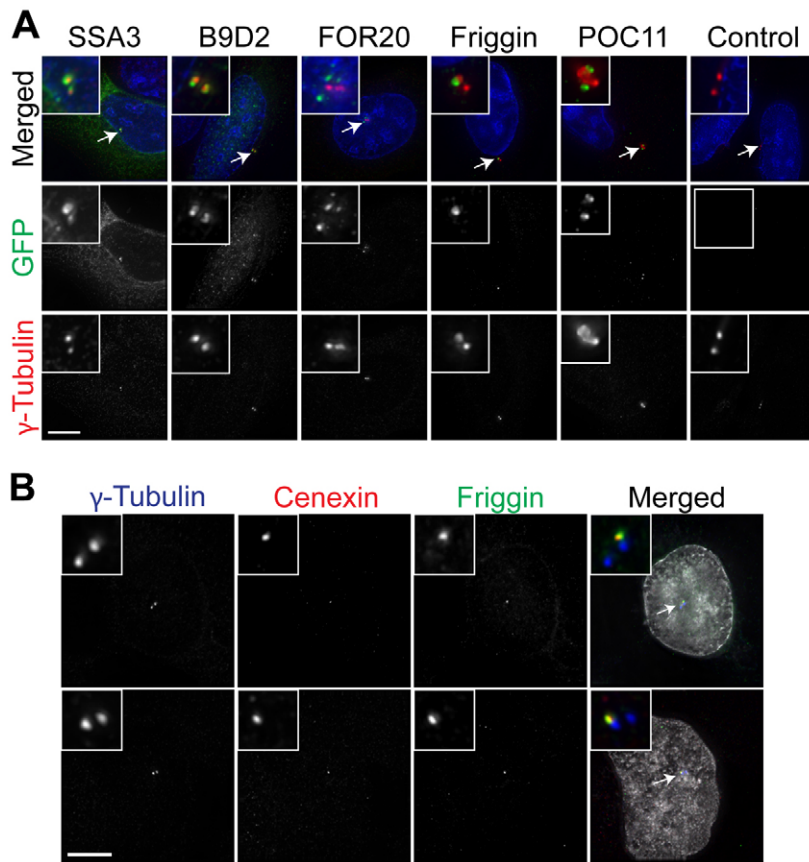

**Fig. 3. Human orthologs of pCCEs localize to centrosomes, including the mother centriole protein Friggin.** GFP-tagged human orthologs of the indicated pCCE are shown in green after transient transfection of U2OS cells. **(A)** Centrosomes (arrows) are stained using an antibody against  $\gamma$ -tubulin (red), and DNA is shown in blue. **(B)** Centrosomes (arrows) are stained with an antibody against  $\gamma$ -tubulin (blue), mother centrioles with an antibody against cenexin (red), and DNA is shown in white. Scale bars: 5  $\mu$ m.

against FOR20 (Sedjai et al., 2010), thus validating our GFP tagging approach.

Second, B9D2 contains a B9 domain. The *C. elegans* homolog, TZA-1, localizes to the transition zone at the base of the cilium (Williams et al., 2008). Although the B9 domain has no known function, it is found in several proteins known to be localized to the centriole and/or basal body, including MKS1 (Dawe et al., 2007). Human B9D2 localized to centrosomes of U2OS cells, along with scattered foci throughout the cytoplasm (Fig. 3A).

Third, POC11 shows good conservation in many eukaryotes but has no identifiable domains other than a coiled-coil region. Localization of the human homolog (CCDC77) resulted in bright punctate spots within centrosomes of both U2OS and HeLa cells (Fig. 3A and data not shown, respectively), suggesting that POC11 represents a new family of centrosome proteins.

Fourth, SSA3 was so named for its predicted function in both motile and nonmotile flagella [SSA stands for 'sensory, structural and assembly' (Merchant et al., 2007)]. SSA3 has a conserved central region containing an 'ELMO/CED12' domain (Pfam domain PF04727), found in proteins that facilitate cytoskeletal rearrangements (Gumienny et al., 2001). SSA3-GFP-expressing cells contained diffuse cytoplasmic GFP, as well as centrosomal GFP in a small percentage (4%) of transfected cells that also displayed relatively small  $\gamma$ -tubulin foci (Fig. 3A). As  $\gamma$ -tubulin foci vary in size during the mammalian cell cycle (with small foci at G1- and early S-phases), SSA3 might localize to centrosomes in a cell-cycle-dependent manner.

Fifth, Friggin was originally named MOT37 for its predicted function in motile flagella (Merchant et al., 2007) and contains

leucine-rich repeats (LRRs), which typically mediate protein-protein interactions [Pfam clan CL0022 (Kobe and Deisenhofer, 1994)]. Unexpectedly, the 542-residue human ortholog of MOT37 localized to only one of two  $\gamma$ -tubulin foci in both U2OS (Fig. 3A) and HeLa cells (data not shown), suggesting that it might be a component specific to either mature or immature centrioles.

Centrioles develop over two cell cycles, acquiring the basic nine-triplet pinwheel structure during the first cell cycle and various appendages that allow it to function as a basal body for axonemal assembly during the second cycle. Several gene products have been shown to be involved in the assembly of appendages (Chang et al., 2003; Gromley et al., 2003; Lange and Gull, 1995; Mogensen et al., 2000; Ou et al., 2002), only one of which,  $\epsilon$ -tubulin (Chang et al., 2003), is conserved outside animals and likely to be ancestral to all extant eukaryotes.

To investigate whether MOT37 is a component of either mother or daughter centrioles, we expressed GFP-MOT37 and stained cells with an antibody recognizing the mother centriole component cenexin (Lange and Gull, 1995). GFP-MOT37 consistently colocalized with cenexin (Fig. 3B), indicating that MOT37 is a mother-centriole-specific protein that we predict is involved in the developmental transition from immature to mature centrioles. Because MOT37 probably represents a second ancestral mother centriole protein, we have named this eukaryotic protein family 'Friggin' after Frigg, the Norse goddess of motherhood.

### Concluding remarks

Understanding how centrioles and flagella assemble and function requires a full inventory of components. Previous studies have

used proteomic approaches to attempt to identify a complete parts list for centrioles (Andersen et al., 2003; Keller et al., 2005; Kilburn et al., 2007) or flagella (for a review, see Inglis et al., 2006). Theoretically, proteomic analyses can identify all stably localized proteins, including those that are species specific or required for unrelated biological functions. By contrast, our analysis has identified comprehensive sets of genes required specifically for centriole and flagellar function, independent of their localization. Of eight previously uncharacterized genes that we predict are involved in centriole assembly, at least three have human orthologs with a centrosome-related localization. The conservation of these proteins in both *Naegleria* and human, probably spanning over a billion years of eukaryotic evolution (Brinkmann and Philippe, 2007), indicates that these proteins are important for centriole function. Our study adds significantly to the list of conserved centriole components, including an additional protein (Friggin) that is apparently specific to mature centrioles.

Our analyses extend previous observations (Fulton et al., 1995; Levy et al., 1998) of two major programs of transcription during *Naegleria* differentiation: an early round of transcription of basal body genes and a later round of flagellar genes (Fig. 2), a timing that mirrors the assembly of basal bodies before flagella (Fig. 1). Although we have limited our analysis to centriole and flagella genes, this represents only one aspect of the *Naegleria* amoeba-to-flagellate transition. A cursory analysis indicates that genes from other core pathways, including basic metabolism and the stress response, are also regulated differentially. We have deposited our microarray data in the NCBI Gene Expression Omnibus (Edgar et al., 2002) under GEO Series accession number GSE21527 and encourage other scientists to take advantage of this rich data set.

## Materials and Methods

### *Naegleria* differentiation and RNA isolation

*N. gruberi* strain NEG grown on *Klebsiella* was differentiated three separate times using standard protocols (Fulton, 1970). Synchrony was estimated by counting the percentage of flagellates after fixing in Lugol's iodine (Fulton and Dingle, 1967), using a phase-contrast microscope with a  $\times 40$  objective ( $n > 100$  for each time-point).  $10^7$  cells were harvested at each time-point, and RNA extracted using Trizol reagent (Invitrogen), purified using RNeasy (Qiagen), treated with Turbo DNase (Ambion), and repurified with RNeasy (Qiagen), according to the manufacturers' instructions. RNA purity was verified by means of gel electrophoresis (supplementary material Fig. S1) and spectrophotometry.

### NimbleGen expression oligoarrays

The *N. gruberi* whole-genome expression oligoarray version 1.0 (NimbleGen Systems) comprises 182,813 probe sets corresponding to 15,777 gene models predicted on the *N. gruberi* genome sequence version 1.0 (Fritz-Laylin et al., 2010a), and an additional 963 open reading frames (ORFs) identified in intergenic regions. For each gene, 11 unique 60-mer oligonucleotide probes were designed by NimbleGen Systems. The *Naegleria* V1.0 oligoarray is fully described at the Gene Expression Omnibus (GEO) (Edgar et al., 2002) under accession number GSE21527.

Preparation of samples, hybridization and scanning were performed by NimbleGen Systems (Madison, WI), following their standard operating protocol. The raw data were subjected to robust multi-array analysis (RMA) (Irizarry et al., 2003), quantile normalization (Bolstad et al., 2003) and background correction, as implemented in the NimbleScan software package, version 2.4.27 (Roche NimbleGen). Reproducibility between biological replicates was inspected using MA [log-intensity ratios (M) versus log-intensity averages (A)] and scatter plots of log intensities (supplementary material Fig. S1), and *P*-values were calculated in a simple paired-data comparison model and were corrected for multiple testing using the BH (false discovery rate controlled) procedure, all within the R statistical package (<http://www.r-project.org/>).

### Expression clustering

The log-transformed expression data for the 310 cytoskeleton-related genes were subjected to gene normalization followed by hierarchical clustering, with centered correlation and complete linkage in the Cluster program (Eisen et al., 1998).

### Proteomics of *Naegleria* flagella

Flagella were isolated using published methods (Kowit and Fulton, 1974) and mass spectrometry performed by the Vincent J. Coates Proteomics/Mass Spectrometry Laboratory at UC Berkeley, CA. A nano LC column was packed in a glass capillary, of 100  $\mu$ m inner diameter, with an emitter tip. The column comprised 10 cm of Polaris c18 5- $\mu$ m packing material (Varian), followed by 4 cm of Partisphere 5 SCX (Whatman). The column was loaded using a pressure bomb and washed extensively with buffer A [5% acetonitrile, 0.02% heptafluorobutyric acid (HBFA)], then directly coupled to an electrospray ionization source mounted on a Thermo-Fisher LTQ XL linear ion-trap mass spectrometer. An Agilent 1200 HPLC delivering a flow rate of 30 nl/min was used for chromatography. Peptides were eluted using a 14-step MudPIT procedure (Washburn et al., 2001), using buffer A, buffer B (80% acetonitrile, 0.02% HBFA), buffer C (250 mM ammonium acetate, 5% acetonitrile, 0.02% HBFA) and buffer D (250 mM ammonium acetate, 5% acetonitrile, 0.02% HBFA, 500 mM ammonium acetate). The programs SEQUEST and DTASELECT were used to identify peptides and proteins from the *Naegleria* genome (Eng et al., 1994; Tabb et al., 2002).

### Localization of pCCCs

The following mammalian cDNAs from the human ORF collection in the form of Gateway entry vectors were purchased from Open Biosystems (Rual et al., 2004): B9D2 (CV025994), MOT52 (FOR20; EL735575), POC16 (EL737049), FM14 (EL735863), SSA3 (EL735155), MOT39 (CV023936) and TECT3 (EL736819), and these were verified by sequencing. The following cDNAs (and corresponding accession numbers) were obtained from Open Biosystems: POC11 (BC006444), MOT37 (BC016439) and LRRC6 (BC047286). Each ORF was amplified (primer sequences available upon request), transferred into a Gateway donor vector (pDONR221) and verified by sequencing. All ORFs were then transferred into the C-terminal (pCDNA-DEST47) and N-terminal (pCDNA-DEST53) GFP-tagged Gateway Vectors according to the manufacturers' protocols.

A total of 20,000 U2OS cells (ATCC catalog number HTB-96) was inoculated in 0.5 ml medium [DMEM (GIBCO catalog number 10569) supplemented with 10% FBS, 1% nonessential amino acids, and 1% sodium pyruvate] in 24-well plates containing coverslips. Cells were transfected the next day with lipofectamine 2000, and 14 hours later fixed for three minutes with methanol and prepared for immunofluorescence using standard methods (<http://mitchison.med.harvard.edu/protocols/gen1.html>), and the following antibodies: monoclonal antibody 20H5 against centrin (antibody 20H5) (Sanders and Salisbury, 1994), used at 1:400, antibody CD1B4 against cenexin (antibody CD1B4) (Lange and Gull, 1995) used at 1:3, and mouse monoclonal antibody against GFP (catalog number 11814460001, Roche) at a 1:500 dilution. Alexa-Fluor-conjugated secondary antibodies were sourced from Invitrogen (Carlsbad, CA) and used at a 1:500 dilution.

### Fluorescence deconvolution microscopy

Images were collected with SoftWorX image acquisition software (Applied Precision, Issaquah, WA) on an Olympus IX70 wide-field inverted fluorescence microscope with an Olympus PlanApo  $\times 100$ , (NA 1.35), oil-immersion objective and Photometrics CCD CH350 camera (Roper Scientific, Tucson, AZ). Image stacks were deconvolved with the SoftWorX deconvolution software and flattened as maximum projections (Applied Precision, Issaquah, WA).

### Sequence analysis

Domain predictions were performed using default parameters and version 24.0 of the Pfam database (Finn et al., 2008). pCCC orthologs were collected from the nonredundant ('nr') database at NCBI (Benson et al., 2009) with BLAST (Altschul et al., 1990).

We thank Lori Kohlstaedt and the Vincent J. Coates Proteomics/Mass Spectrometry Laboratory at UC Berkeley, CA, for help with mass spectrometry experiments, Lani Keller, Juliette Azimzadeh, Hellen Dawe and Tim Stearns for helpful advice, Pierre Gönczy, Rebecca Heald, Scott Dawson, and Chandler Fulton for valuable comments on the manuscript and Keith Gull for the generous gift of the antibody against cenexin. This study was supported by a grant from the University of California Cancer Research Coordinating Committee (CRCC) to W.Z.C. and NIH grant A1054693 to W.Z.C. Article deposited in PMC for release after 12 months.

Supplementary material available online at

<http://jcs.biologists.org/cgi/content/full/123/23/4024/DC1>

## References

- Altschul, S. F., Gish, W., Miller, W., Myers, E. W. and Lipman, D. J. (1990). Basic local alignment search tool. *J. Mol. Biol.* **215**, 403-410.
- Andersen, J. S., Wilkinson, C. J., Mayor, T., Mortensen, P., Nigg, E. A. and Mann, M. (2003). Proteomic characterization of the human centrosome by protein correlation profiling. *Nature* **426**, 570-574.

- Basto, R., Lau, J., Vinogradova, T., Gardiol, A., Woods, C. G., Khodjakov, A. and Raff, J. W. (2006). Flies without centrioles. *Cell* **125**, 1375-1386.
- Baum, P., Furlong, C. and Byers, B. (1986). Yeast gene required for spindle pole body duplication: homology of its product with  $\text{Ca}^{2+}$ -binding proteins. *Proc. Natl. Acad. Sci. USA* **83**, 5512-5516.
- Benson, D. A., Karsch-Mizrachi, I., Lipman, D. J., Ostell, J. and Sayers, E. W. (2009). GenBank. *Nucleic Acids Res.* **37**, D26-D31.
- Bolstad, B. M., Irizarry, R. A., Astrand, M. and Speed, T. P. (2003). A comparison of normalization methods for high density oligonucleotide array data based on variance and bias. *Bioinformatics* **19**, 185-193.
- Brinkmann, H. and Philippe, H. (2007). The diversity of eukaryotes and the root of the eukaryotic tree. *Adv. Exp. Med. Biol.* **607**, 20-37.
- Carvalho-Santos, Z., Machado, P., Branco, P., Tavares-Cadete, F., Rodrigues-Martins, A., Pereira-Leal, J. B. and Bettencourt-Dias, M. (2010). Stepwise evolution of the centriole-assembly pathway. *J. Cell Sci.* **123**, 1414-1426.
- Cavalier-Smith, T. (2002). The phagotrophic origin of eukaryotes and phylogenetic classification of Protozoa. *Int. J. Syst. Evol. Microbiol.* **52**, 297-354.
- Chang, P., Giddings, T. H., Jr, Winey, M. and Stearns, T. (2003). Epsilon-tubulin is required for centriole duplication and microtubule organization. *Nat. Cell Biol.* **5**, 71-76.
- Ciccarelli, F. D., Doerks, T., von Mering, C., Creevey, C. J., Snel, B. and Bork, P. (2006). Toward automatic reconstruction of a highly resolved tree of life. *Science* **311**, 1283-1287.
- Culver, B. P., Meehl, J. B., Giddings, T. H., Jr and Winey, M. (2009). The two SAS-6 homologs in *Tetrahymena thermophila* have distinct functions in basal body assembly. *Mol. Biol. Cell* **20**, 1865-1877.
- Dammermann, A., Muller-Reichert, T., Pelletier, L., Habermann, B., Desai, A. and Oegema, K. (2004). Centriole assembly requires both centriolar and pericentriolar material proteins. *Dev. Cell* **7**, 815-829.
- Dawe, H. R., Smith, U. M., Cullinane, A. R., Gerrelli, D., Cox, P., Badano, J. L., Blair-Reid, S., Sriram, N., Katsanis, N., Attie-Bitach, T. et al. (2007). The Meckel-Gruber Syndrome proteins MKS1 and meckelin interact and are required for primary cilium formation. *Hum. Mol. Genet.* **16**, 173-186.
- Dutcher, S. K. (2001). The tubulin fraternity: alpha to eta. *Curr. Opin. Cell Biol.* **13**, 49-54.
- Dutcher, S. K. and Trabuco, E. C. (1998). The UN13 gene is required for assembly of basal bodies of *Chlamydomonas* and encodes delta-tubulin, a new member of the tubulin superfamily. *Mol. Biol. Cell* **9**, 1293-1308.
- Dutcher, S. K., Morrisette, N. S., Preble, A. M., Rackley, C. and Stanga, J. (2002). Epsilon-tubulin is an essential component of the centriole. *Mol. Biol. Cell* **13**, 3859-3869.
- Edgar, R., Domrachev, M. and Lash, A. E. (2002). Gene Expression Omnibus: NCBI gene expression and hybridization array data repository. *Nucleic Acids Res.* **30**, 207-210.
- Eisen, M. B., Spellman, P. T., Brown, P. O. and Botstein, D. (1998). Cluster analysis and display of genome-wide expression patterns. *Proc. Natl. Acad. Sci. USA* **95**, 14863-14868.
- Eng, J. K., McCormack, A. L. and Yates, J. R., III (1994). An approach to correlate tandem mass spectral data of peptides with amino acid sequences in a protein database. *J. Am. Soc. Mass Spectrom.* **5**, 976-989.
- Finn, R. D., Tate, J., Misty, J., Coghill, P. C., Sammut, S. J., Hotz, H. R., Ceric, G., Forslund, K., Eddy, S. R., Sonnhammer, E. L. et al. (2008). The Pfam protein families database. *Nucleic Acids Res.* **36**, D281-D288.
- Fritz-Laylin, L. K., Assaf, Z. J., Chen, S. and Cande, W. Z. (2010a). *Naegleria* de novo basal body assembly occurs via stepwise incorporation of conserved proteins. *Eukaryotic Cell* **9**, 860-865.
- Fritz-Laylin, L. K., Prochnik, S. E., Ginger, M. L., Dacks, J., Carpenter, M. L., Field, M. C., Kuo, A., Paredez, A., Chapman, J., Pham, J. et al. (2010b). The genome of *Naegleria gruberi* illuminates early eukaryotic versatility. *Cell* **140**, 631-642.
- Fulton, C. (1970). Amebo-flagellates as research partners: the laboratory biology of *Naegleria* and *Tetramitus*. *Methods Cell Physiol.* **4**, 341-476.
- Fulton, C. (1977). Cell differentiation in *Naegleria gruberi*. *Annu. Rev. Microbiol.* **31**, 597-629.
- Fulton, C. and Dingle, A. D. (1967). Appearance of the flagellate phenotype in populations of *Naegleria* amoebae. *Dev. Biol.* **15**, 165-191.
- Fulton, C. and Dingle, A. D. (1971). Basal bodies, but not centrioles, in *Naegleria*. *J. Cell Biol.* **51**, 826-836.
- Fulton, C., Lai, E. Y. and Remillard, S. P. (1995). A flagellar calmodulin gene of *Naegleria*, coexpressed during differentiation with flagellar tubulin genes, shares DNA, RNA, and encoded protein sequence elements. *J. Biol. Chem.* **270**, 5839-5848.
- Garreau de Loubresse, N., Ruiz, F., Beisson, J. and Klotz, C. (2001). Role of delta-tubulin and the C-tubule in assembly of *Paramecium* basal bodies. *BMC Cell Biol.* **2**, 4.
- Gorden, N. T., Arts, H. H., Parisi, M. A., Coene, K. L., Letteboer, S. J., van Beersum, S. E., Mans, D. A., Hikida, A., Eckert, M., Knutzen, D. et al. (2008). CC2D2A is mutated in Joubert syndrome and interacts with the ciliopathy-associated basal body protein CEP290. *Am. J. Hum. Genet.* **83**, 559-571.
- Gromley, A., Jurczyk, A., Silibourne, J., Halilovic, E., Mogensen, M., Groisman, L., Blomberg, M. and Doxsey, S. (2003). A novel human protein of the maternal centriole is required for the final stages of cytokinesis and entry into S phase. *J. Cell Biol.* **161**, 535-545.
- Gumienny, T. L., Brugnera, E., Tosello-Trampont, A. C., Kinchen, J. M., Haney, L. B., Nishiwaki, K., Walk, S. F., Nemergut, M. E., Macara, I. G., Francis, R. et al. (2001). CED-12/ELMO, a novel member of the CrkII/Dock180/Rac pathway, is required for phagocytosis and cell migration. *Cell* **107**, 27-41.
- Hammond, J. W., Cai, D. and Verhey, K. J. (2008). Tubulin modifications and their cellular functions. *Curr. Opin. Cell Biol.* **20**, 71-76.
- Harrison, A., Olds-Clarke, P. and King, S. M. (1998). Identification of the t complex-encoded cytoplasmic dynein light chain tctex1 in inner arm II supports the involvement of flagellar dyneins in meiotic drive. *J. Cell Biol.* **140**, 1137-1147.
- Hartman, J. J., Mahr, J., McNally, K., Okawa, K., Iwamatsu, A., Thomas, S., Cheesman, S., Heuser, J., Vale, R. D. and McNally, F. J. (1998). Katanin, a microtubule-severing protein, is a novel AAA ATPase that targets to the centrosome using a WD40-containing subunit. *Cell* **93**, 277-287.
- Hodges, M. E., Scheumann, N., Wickstead, B., Langdale, J. A. and Gull, K. (2010). Reconstructing the evolutionary history of the centriole from protein components. *J. Cell Sci.* **123**, 1407-1413.
- Inglis, P. N., Boroevich, K. A. and Leroux, M. R. (2006). Piecing together a ciliome. *Trends Genet.* **22**, 491-500.
- Irizarry, R. A., Hobbs, B., Collin, F., Beazer-Barclay, Y. D., Antonellis, K. J., Scherf, U. and Speed, T. P. (2003). Exploration, normalization, and summaries of high density oligonucleotide array probe level data. *Biostatistics* **4**, 249-264.
- Kagami, O., Gotoh, M., Makino, Y., Mohri, H., Kamiya, R. and Ogawa, K. (1998). A dynein light chain of sea urchin sperm flagella is a homolog of mouse Tctex 1, which is encoded by a gene of the t complex sterility locus. *Gene* **211**, 383-386.
- Keller, L. C., Romijn, E. P., Zamora, I., Yates, J. R., 3rd and Marshall, W. F. (2005). Proteomic analysis of isolated *Chlamydomonas* centrioles reveals orthologs of ciliary-disease genes. *Curr. Biol.* **15**, 1090-1098.
- Keller, L. C., Geimer, S., Romijn, E., Yates, J., 3rd, Zamora, I. and Marshall, W. F. (2009). Molecular architecture of the centriole proteome: the conserved WD40 domain protein POC1 is required for centriole duplication and length control. *Mol. Biol. Cell* **20**, 1150-1166.
- Kilburn, C. L., Pearson, C. G., Romijn, E. P., Meehl, J. B., Giddings, T. H., Jr, Culver, B. P., Yates, J. R., 3rd and Winey, M. (2007). New *Tetrahymena* basal body protein components identify basal body domain structure. *J. Cell Biol.* **178**, 905-912.
- Kirkham, M., Muller-Reichert, T., Oegema, K., Grill, S. and Hyman, A. A. (2003). SAS-4 is a C. elegans centriolar protein that controls centrosome size. *Cell* **112**, 575-587.
- Kleylein-Sohn, J., Westendorf, J., Le Clech, M., Habadanck, R., Stierhof, Y. D. and Nigg, E. A. (2007). Plk4-induced centriole biogenesis in human cells. *Dev. Cell* **13**, 190-202.
- Kobe, B. and Deisenhofer, J. (1994). The leucine-rich repeat: a versatile binding motif. *Trends Biochem. Sci.* **19**, 415-421.
- Koblenz, B., Schoppmeier, J., Grunow, A. and Lechtreck, K. F. (2003). Centrin deficiency in *Chlamydomonas* causes defects in basal body replication, segregation and maturation. *J. Cell Sci.* **116**, 2635-2646.
- Kowit, J. D. and Fulton, C. (1974). Purification and properties of flagellar outer doublet tubulin from *Naegleria gruberi* and a radioimmune assay for tubulin. *J. Biol. Chem.* **249**, 3638-3646.
- Kuchka, M. R. and Jarvik, J. W. (1982). Analysis of flagellar size control using a mutant of *Chlamydomonas reinhardtii* with a variable number of flagella. *J. Cell Biol.* **92**, 170-175.
- Lachmann, M., Gelbmann, D., Kalman, E., Polgar, B., Buschle, M., Von Gabain, A., Szekeres-Bartho, J. and Nagy, E. (2004). PIBF (progesterone induced blocking factor) is overexpressed in highly proliferating cells and associated with the centrosome. *Int. J. Cancer* **112**, 51-60.
- Lai, E. Y., Remillard, S. P. and Fulton, C. (1988). The alpha-tubulin gene family expressed during cell differentiation in *Naegleria gruberi*. *J. Cell Biol.* **106**, 2035-2046.
- Lange, B. M. and Gull, K. (1995). A molecular marker for centriole maturation in the mammalian cell cycle. *J. Cell Biol.* **130**, 919-927.
- Leidel, S. and Gönczy, P. (2003). SAS-4 is essential for centrosome duplication in *C. elegans* and is recruited to daughter centrioles once per cell cycle. *Dev. Cell* **4**, 431-439.
- Leidel, S., Delattre, M., Cerutti, L., Baumer, K. and Gönczy, P. (2005). SAS-6 defines a protein family required for centrosome duplication in *C. elegans* and in human cells. *Nat. Cell Biol.* **7**, 115-125.
- Levy, Y. Y., Lai, E. Y., Remillard, S. P. and Fulton, C. (1998). Centrin is synthesized and assembled into basal bodies during *Naegleria* differentiation. *Cell Motil. Cytoskeleton* **40**, 249-260.
- Marshall, W. F. and Nonaka, S. (2006). Cilia: tuning in to the cell's antenna. *Curr. Biol.* **16**, R604-R614.
- Merchant, S. S., Prochnik, S. E., Vallon, O., Harris, E. H., Karpowicz, S. J., Witman, G. B., Terry, A., Salamov, A., Fritz-Laylin, L. K., Marechal-Drouard, L. et al. (2007). The *Chlamydomonas* genome reveals the evolution of key animal and plant functions. *Science* **318**, 245-250.
- Mikolajka, A., Yan, X., Popowicz, G. M., Smialowski, P., Nigg, E. A. and Holak, T. A. (2006). Structure of the N-terminal domain of the FOP (FGFR1OP) protein and implications for its dimerization and centrosomal localization. *J. Mol. Biol.* **359**, 863-875.
- Mogensen, M. M., Malik, A., Piel, M., Bouckson-Castaing, V. and Bornens, M. (2000). Microtubule minus-end anchorage at centrosomal and non-centrosomal sites: the role of ninein. *J. Cell Sci.* **113**, 3013-3023.
- Nakazawa, Y., Hiraki, M., Kamiya, R. and Hirono, M. (2007). SAS-6 is a cartwheel protein that establishes the 9-fold symmetry of the centriole. *Curr. Biol.* **17**, 2169-2174.
- Omran, H., Kobayashi, D., Olbrich, H., Tsukahara, T., Loges, N. T., Hagiwara, H., Zhang, Q., Leblond, G., O'Toole, E., Hara, C. et al. (2008). Ktu/PF13 is required for cytoplasmic pre-assembly of axonemal dyneins. *Nature* **456**, 611-616.



- O'Toole, E. T., Giddings, T. H., McIntosh, J. R. and Dutcher, S. K. (2003). Three-dimensional organization of basal bodies from wild-type and delta-tubulin deletion strains of *Chlamydomonas reinhardtii*. *Mol. Biol. Cell* **14**, 2999-3012.
- Ou, Y. Y., Mack, G. J., Zhang, M. and Rattner, J. B. (2002). CEP110 and ninein are located in a specific domain of the centrosome associated with centrosome maturation. *J. Cell Sci.* **115**, 1825-1835.
- Pazour, G. J., Agrin, N., Leszyk, J. and Witman, G. B. (2005). Proteomic analysis of a eukaryotic cilium. *J. Cell Biol.* **170**, 103-113.
- Pearson, C. G., Osborn, D. P., Giddings, T. H., Jr, Beales, P. L. and Winey, M. (2009). Basal body stability and ciliogenesis requires the conserved component Poc1. *J. Cell Biol.* **187**, 905-920.
- Peel, N., Stevens, N. R., Basto, R. and Raff, J. W. (2007). Overexpressing centriole-replication proteins in vivo induces centriole overduplication and de novo formation. *Curr. Biol.* **17**, 834-843.
- Pelletier, L., O'Toole, E., Schwager, A., Hyman, A. A. and Muller-Reichert, T. (2006). Centriole assembly in *Caenorhabditis elegans*. *Nature* **444**, 619-623.
- Raynaud-Messina, B. and Merdes, A. (2007). Gamma-tubulin complexes and microtubule organization. *Curr. Opin. Cell Biol.* **19**, 24-30.
- Rodrigues-Martins, A., Bettencourt-Dias, M., Riparbelli, M., Ferreira, C., Ferreira, I., Callaini, G. and Glover, D. M. (2007). DSAS-6 organizes a tube-like centriole precursor, and its absence suggests modularity in centriole assembly. *Curr. Biol.* **17**, 1465-1472.
- Rual, J. F., Hirozane-Kishikawa, T., Hao, T., Bertin, N., Li, S., Dricot, A., Li, N., Rosenberg, J., Lamesch, P., Vidalain, P. O. et al. (2004). Human ORFeome version 1.1: a platform for reverse proteomics. *Genome Res.* **14**, 2128-2135.
- Salisbury, J. L., Suino, K. M., Busby, R. and Springett, M. (2002). Centrin-2 is required for centriole duplication in mammalian cells. *Curr. Biol.* **12**, 1287-1292.
- Sanders, M. A. and Salisbury, J. L. (1994). Centrin plays an essential role in microtubule severing during flagellar excision in *Chlamydomonas reinhardtii*. *J. Cell Biol.* **124**, 795-805.
- Sedjai, F., Acquaviva, C., Chevrier, V., Chauvin, J. P., Coppin, E., Aouane, A., Coulter, F., Tolun, A., Pierres, M., Birnbaum, D. et al. (2010). Control of ciliogenesis by FOR20, a novel centrosome and pericentriolar satellite protein. *J. Cell Sci.* **123**, 2391-2401.
- Strnad, P. and Gönczy, P. (2008). Mechanisms of procentriole formation. *Trends Cell Biol.* **18**, 389-396.
- Strnad, P., Leidel, S., Vinogradova, T., Euteneuer, U., Khodjakov, A. and Gönczy, P. (2007). Regulated HsSAS-6 levels ensure formation of a single procentriole per centriole during the centrosome duplication cycle. *Dev. Cell* **13**, 203-213.
- Tabb, D. L., McDonald, W. H. and Yates, J. R., 3rd (2002). DTASelect and Contrast: tools for assembling and comparing protein identifications from shotgun proteomics. *J. Proteome Res.* **1**, 21-26.
- Taillon, B. E., Adler, S. A., Suhan, J. P. and Jarvik, J. W. (1992). Mutational analysis of centrin: an EF-hand protein associated with three distinct contractile fibers in the basal body apparatus of *Chlamydomonas*. *J. Cell Biol.* **119**, 1613-1624.
- Tam, L. W. and Lefebvre, P. A. (2002). The *Chlamydomonas* MBO2 locus encodes a conserved coiled-coil protein important for flagellar waveform conversion. *Cell Motil. Cytoskeleton* **51**, 197-212.
- Washburn, M. P., Wolters, D. and Yates, J. R., 3rd (2001). Large-scale analysis of the yeast proteome by multidimensional protein identification technology. *Nat. Biotechnol.* **19**, 242-247.
- Williams, C. L., Winkelbauer, M. E., Schafer, J. C., Michaud, E. J. and Yoder, B. K. (2008). Functional redundancy of the B9 proteins and nephrocystins in *Caenorhabditis elegans* ciliogenesis. *Mol. Biol. Cell* **19**, 2154-2168.
- Winey, M., Goetsch, L., Baum, P. and Byers, B. (1991). MPS1 and MPS2: novel yeast genes defining distinct steps of spindle pole body duplication. *J. Cell Biol.* **114**, 745-754.
- Wloga, D., Rogowski, K., Sharma, N., Van Dijk, J., Janke, C., Edde, B., Bre, M. H., Levilliers, N., Redeker, V., Duan, J. et al. (2008). Glutamylation on alpha-tubulin is not essential but affects the assembly and functions of a subset of microtubules in *Tetrahymena thermophila*. *Eukaryotic Cell* **7**, 1362-1372.
